# Supplementary material for: Construction of 1-D 4f and 3d–4f coordination polymers with flexible Schiff base ligands
Source: Royal Society of Chemistry journal article supplement (doi:10.1039/c1dt11036e), 2011-01-01
Supplement: c1dt11036e.pdf [file c1dt11036e.pdf]

# Construction of 1-D 4f and 3d-4f Coordination Polymers with Flexible Schiff Base Ligands

Xiaoping Yang,<sup>a</sup> Daniel Lam,<sup>a</sup> Christopher Chan,<sup>a</sup> Julie M. Stanley,<sup>a</sup> Richard A. Jones,<sup>\*a</sup> and Bradley J. Holliday,<sup>a</sup> Wai-Kwok Wong<sup>\*b</sup>

## Supplementary Information:

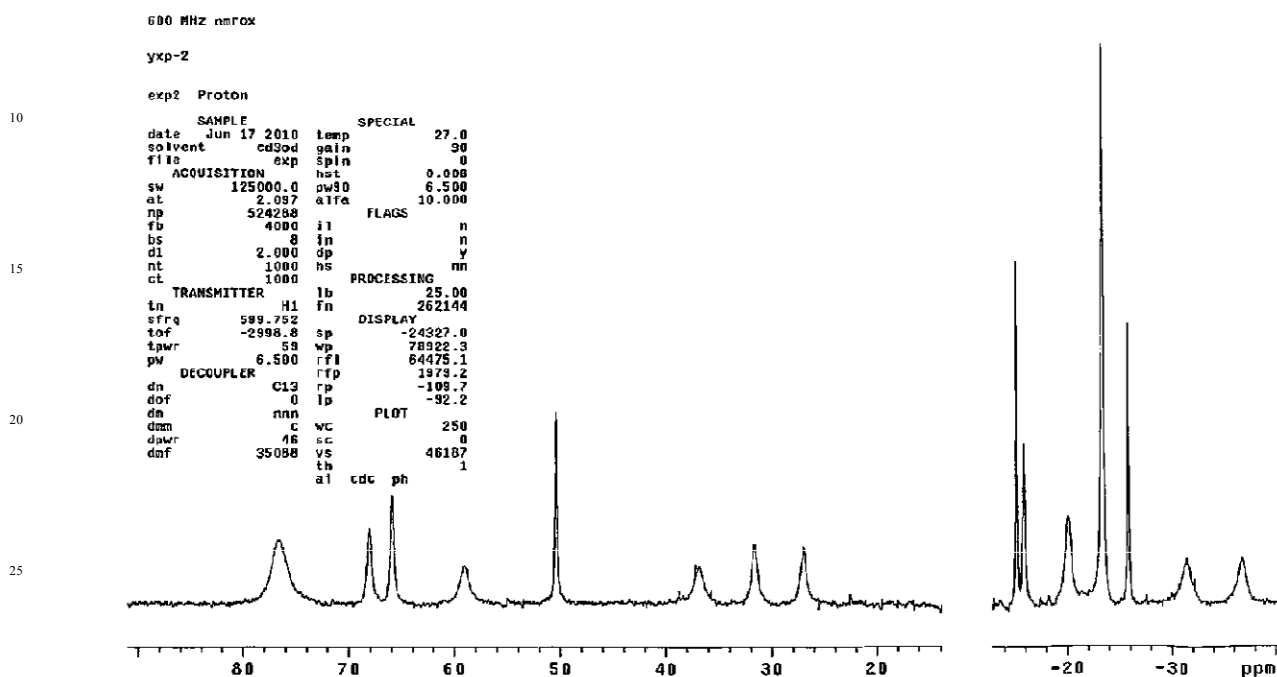

Figure S1. <sup>1</sup>H NMR spectrum of **2** in CD<sub>3</sub>OD (600 MHz, 298 K). The peaks of solvent, H<sub>2</sub>O and EtOH have been omitted for clarity.

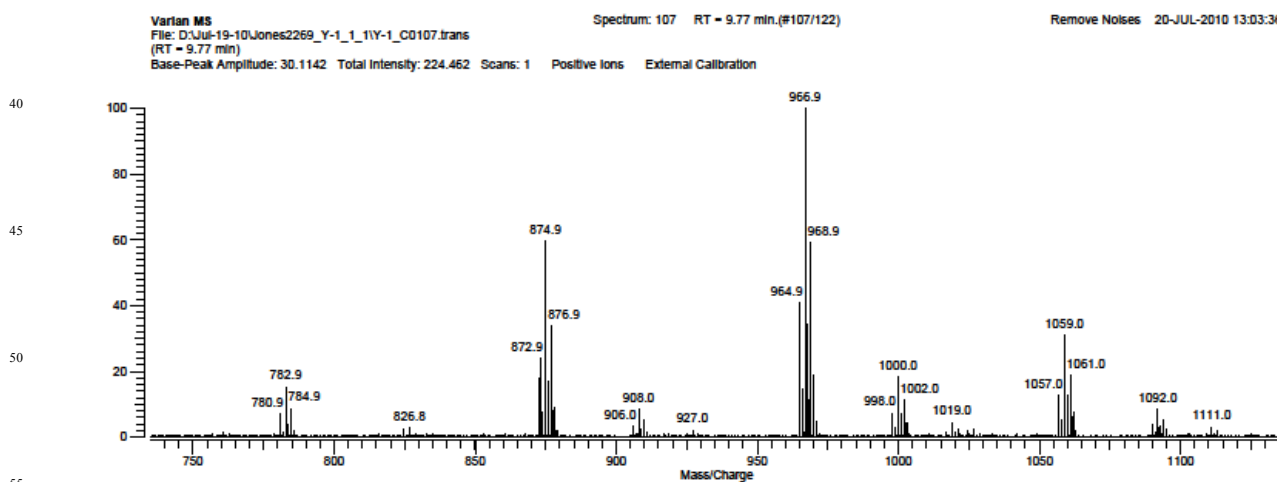

Figure S2. ESI HR-MS spectrum of **1**.

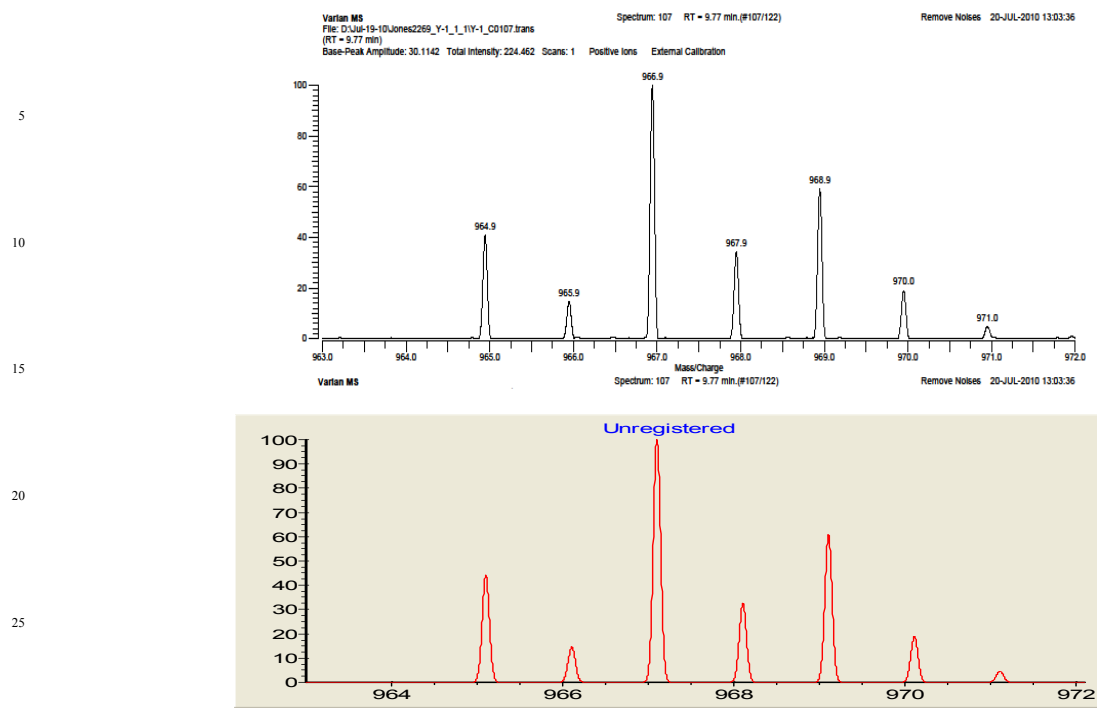

**Figure S3.** (a) Peaks for the species  $[\text{Eu}_2(\text{H}_2\text{L})(\text{OAc})_4(\text{H}_2\text{O})_3\text{OH}]^+$  ( $\text{Eu}_2\text{C}_{28}\text{H}_{43}\text{N}_2\text{O}_{16}$ ); (b) Theoretical isotope distribution pattern for  $[\text{Eu}_2\text{C}_{28}\text{H}_{43}\text{N}_2\text{O}_{16}]^+$ .

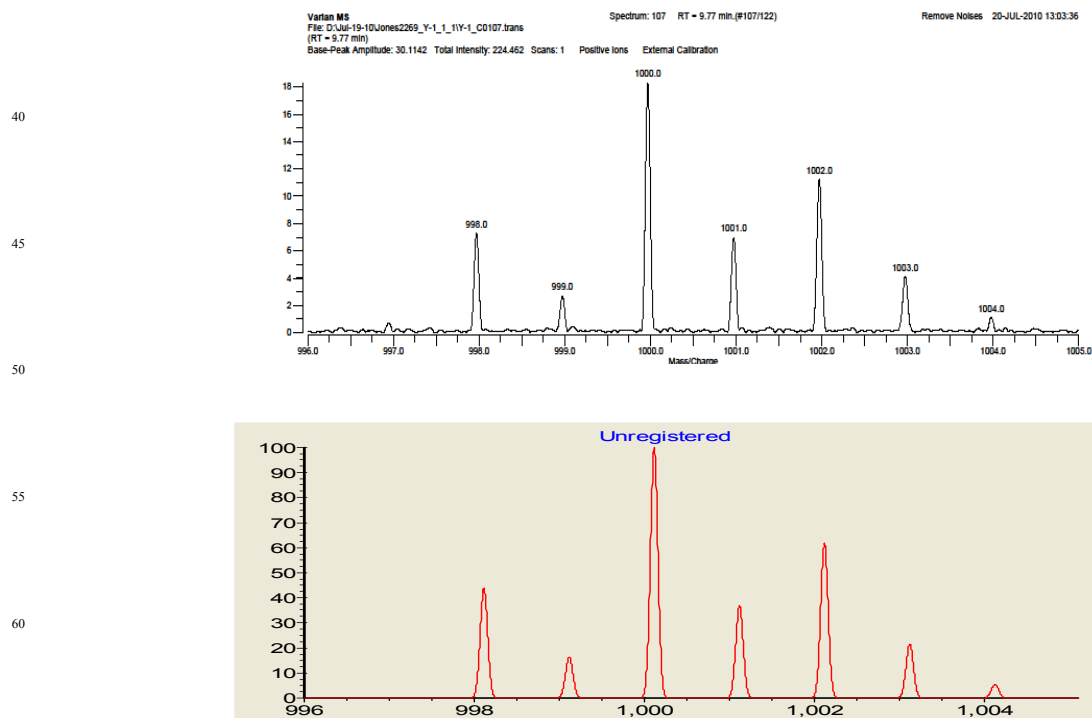

**Figure S4.** (a) Peaks for the species  $[\text{Eu}_2(\text{H}_2\text{L})(\text{OAc})_5\text{EtOH}]^+$  ( $\text{Eu}_2\text{C}_{32}\text{H}_{45}\text{N}_2\text{O}_{15}$ ); (b) Theoretical isotope distribution pattern for  $[\text{Eu}_2\text{C}_{32}\text{H}_{45}\text{N}_2\text{O}_{15}]^+$ .

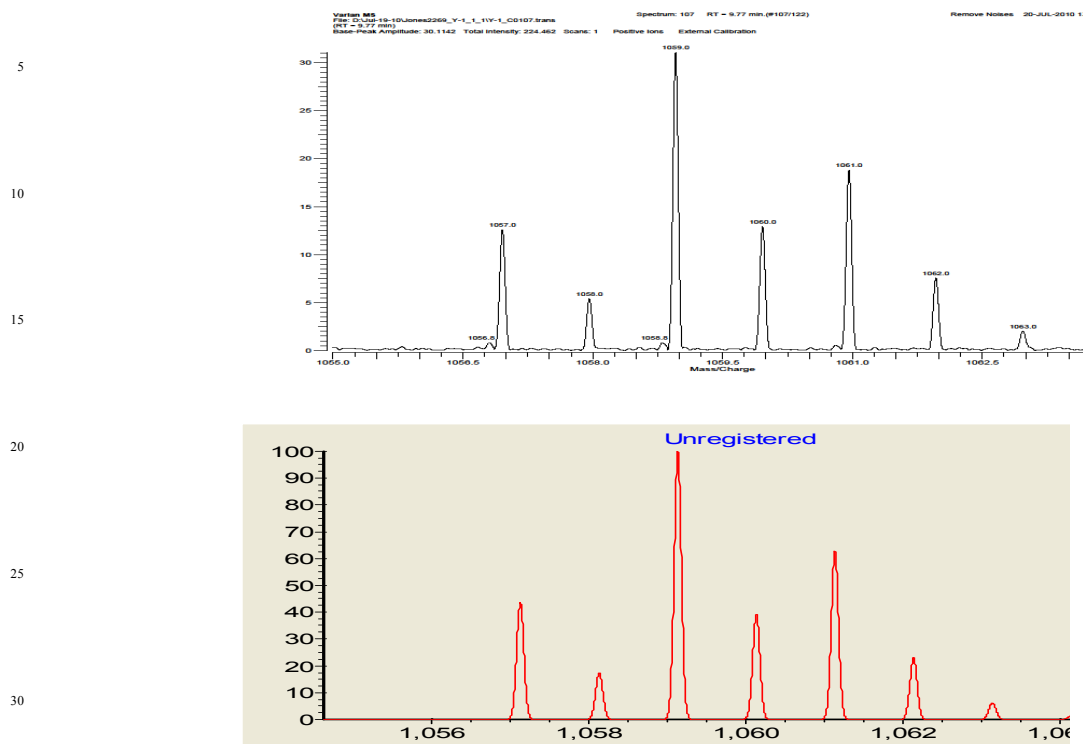

Figure S5. (a) Peaks for the species  $[\text{Eu}_2(\text{H}_2\text{L})(\text{OAc})_6\text{EtOH}+\text{H}]^+$  ( $\text{Eu}_2\text{C}_{34}\text{H}_{49}\text{N}_2\text{O}_{17}$ ); (b) Theoretical isotope distribution pattern for  $[\text{Eu}_2\text{C}_{34}\text{H}_{49}\text{N}_2\text{O}_{17}]^+$ .

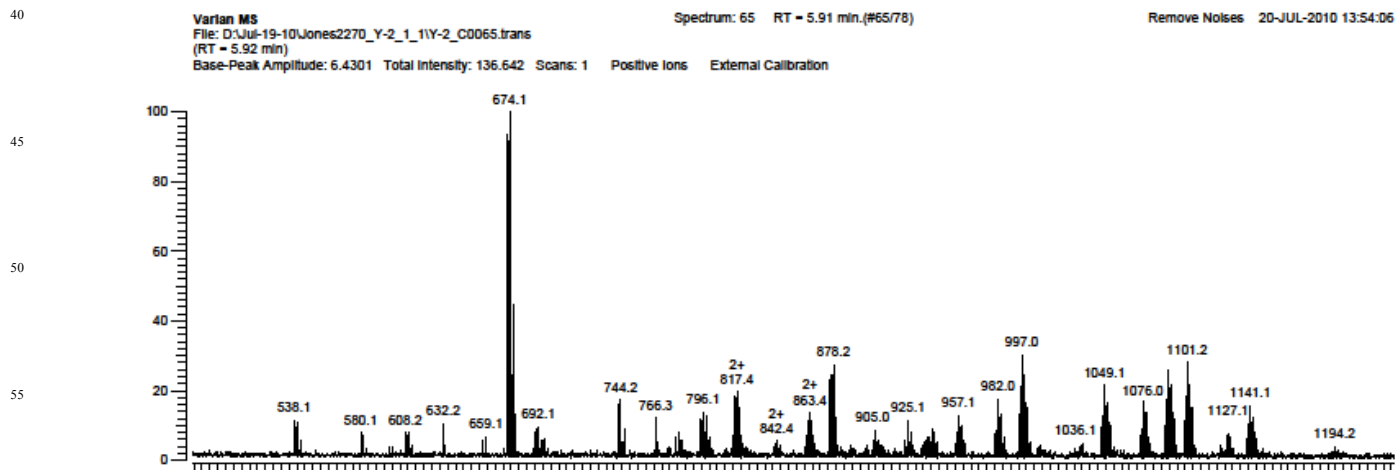

Figure S6. ESI HR-MS spectrum of 2.

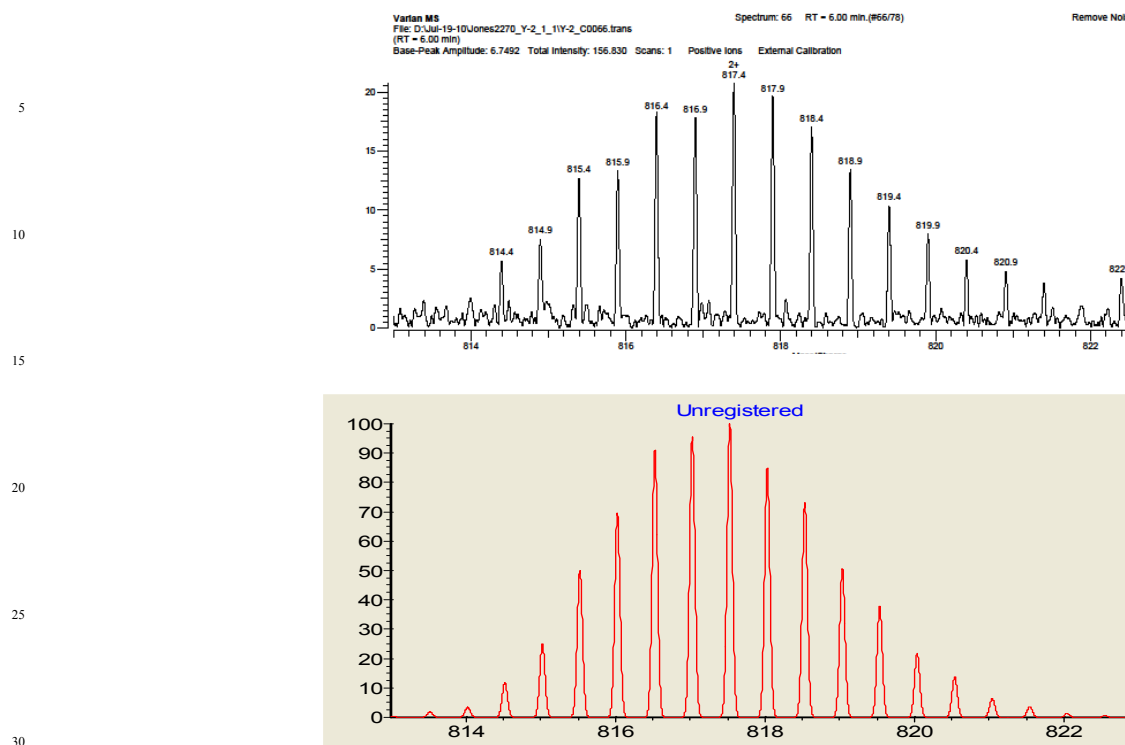

**Figure S7.** (a) Peaks for the species  $[\text{Er}_4(\text{H}_2\text{L})(\text{OAc})_{10}\text{H}_2\text{O}]^{2+}$  ( $\text{Er}_4\text{C}_{40}\text{H}_{56}\text{N}_2\text{O}_{25}$ ); (b) Theoretical isotope distribution pattern for  $[\text{Er}_4\text{C}_{40}\text{H}_{56}\text{N}_2\text{O}_{25}]^{2+}$ .

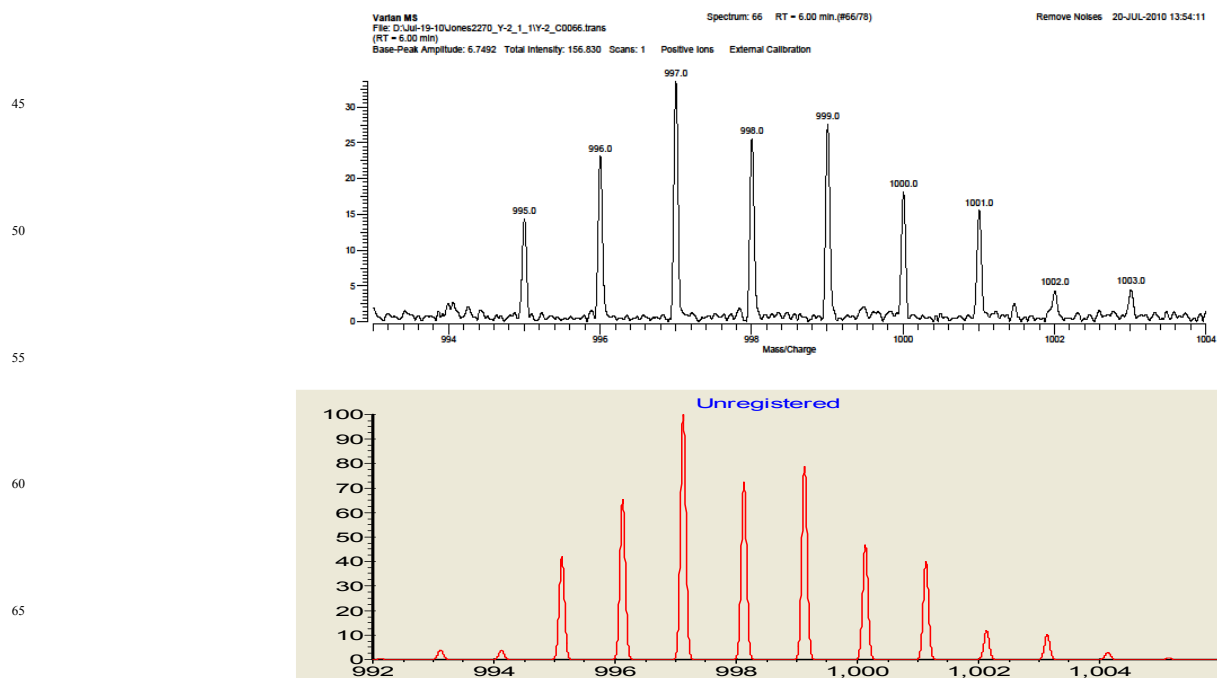

**Figure S8.** (a) Peaks for the species  $[\text{Er}_2(\text{H}_2\text{L})(\text{OAc})_4(\text{H}_2\text{O})_3\text{OH}]^+$  ( $\text{Er}_2\text{C}_{28}\text{H}_{43}\text{N}_2\text{O}_{16}$ ); (b) Theoretical isotope distribution pattern for  $[\text{Er}_2\text{C}_{28}\text{H}_{43}\text{N}_2\text{O}_{16}]^+$ .

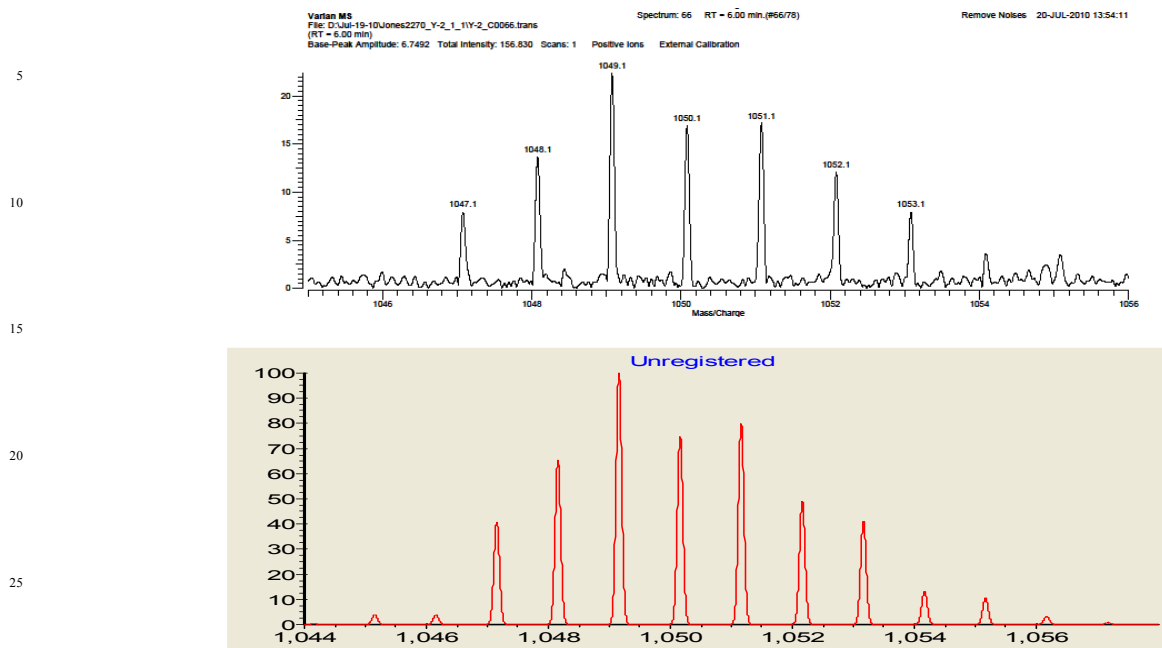

Figure S9. (a) Peaks for the species  $[\text{Er}_2(\text{H}_2\text{L})(\text{OAc})_5(\text{EtOH})\text{H}_2\text{O}]^+$  ( $\text{Er}_2\text{C}_{32}\text{H}_{47}\text{N}_2\text{O}_{16}$ ); (b) Theoretical isotope distribution pattern for  $[\text{Er}_2\text{C}_{32}\text{H}_{47}\text{N}_2\text{O}_{16}]^+$ .

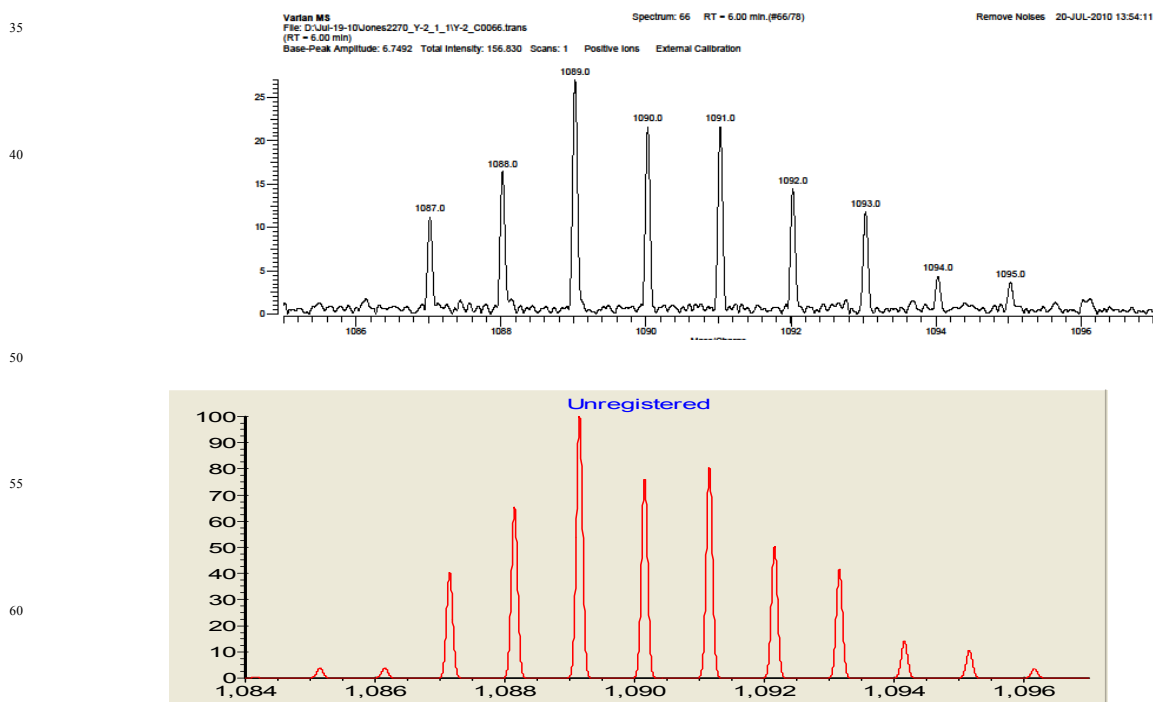

Figure S10. (a) Peaks for the species  $[\text{Er}_2(\text{H}_2\text{L})(\text{OAc})_6\text{EtOH}+\text{H}]^+$  ( $\text{Er}_2\text{C}_{34}\text{H}_{49}\text{N}_2\text{O}_{17}$ ); (b) Theoretical isotope distribution pattern for  $[\text{Er}_2\text{C}_{34}\text{H}_{49}\text{N}_2\text{O}_{17}]^+$ .

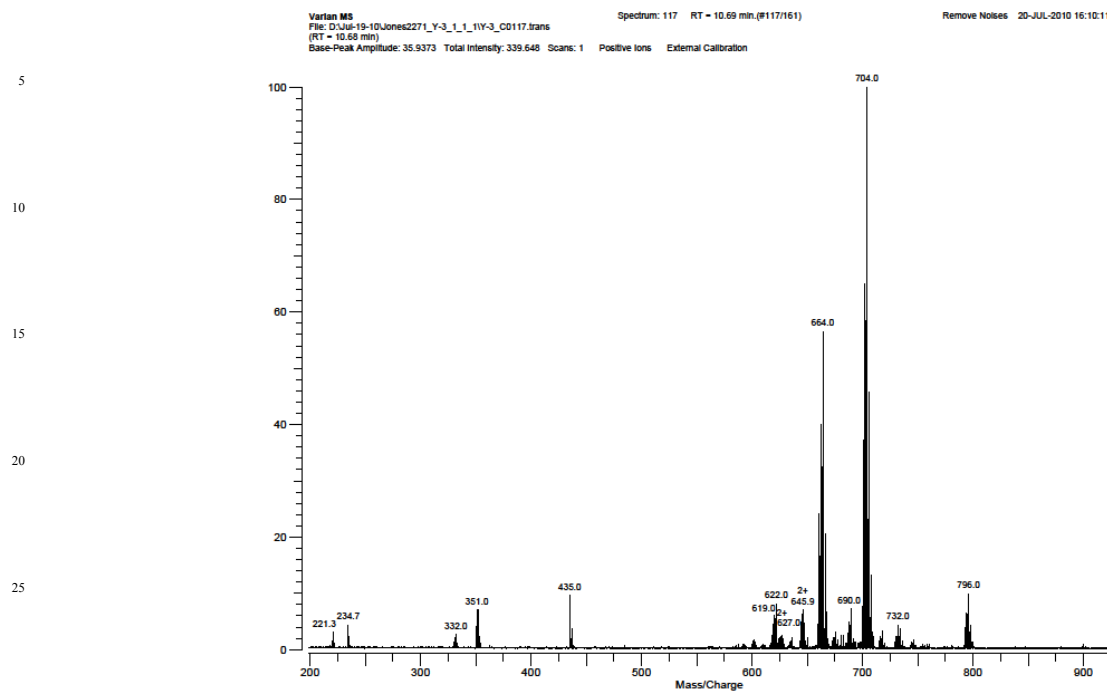

Figure S11. ESI HR-MS spectrum of 3.

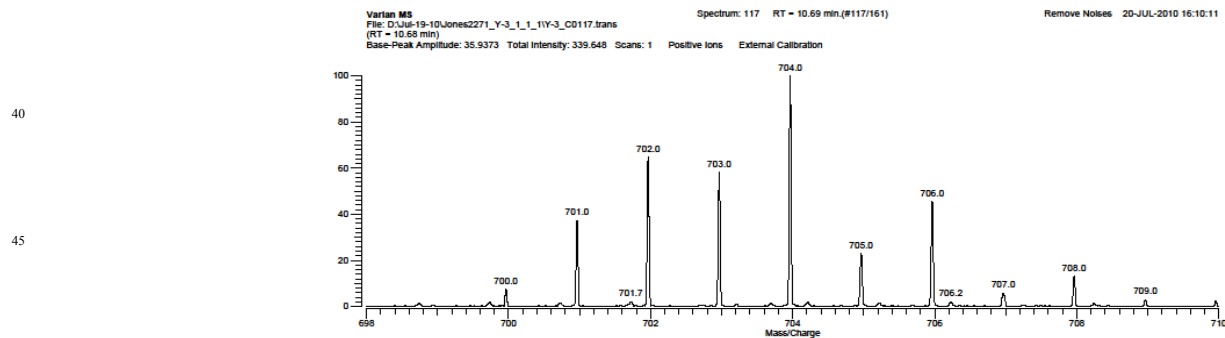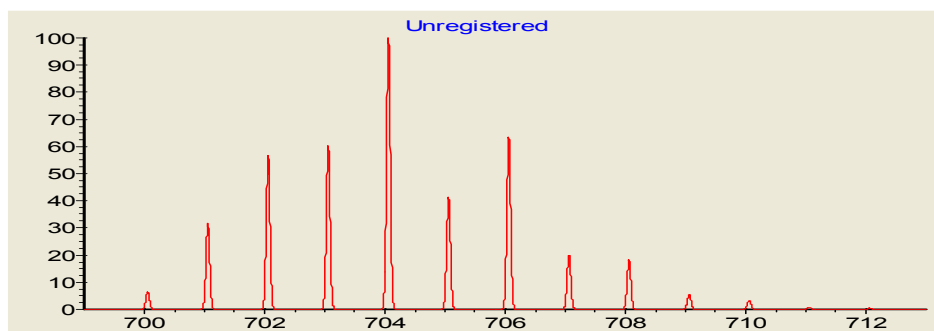

Figure S12. (a) Peaks for the species  $[\text{YbNiL}(\text{OAc})_2]^+$  ( $\text{YbNiC}_{24}\text{H}_{28}\text{N}_2\text{O}_8$ ); (b) Theoretical isotope distribution pattern for  $[\text{YbNiC}_{24}\text{H}_{28}\text{N}_2\text{O}_8]^+$ .

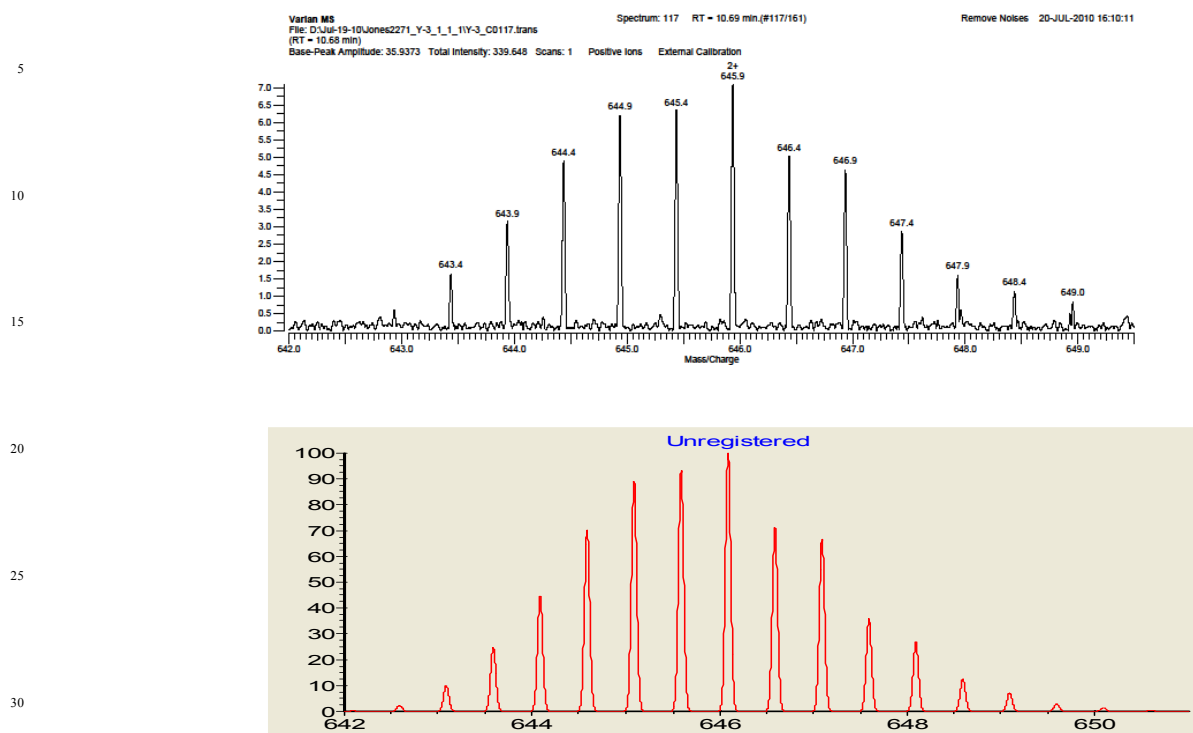

**Figure S13.** (a) Peaks for the species  $[Yb_2NiL_2(OAc)_3+H]^{2+}$  ( $Yb_2NiC_{46}H_{54}N_4O_{14}$ ); (b) Theoretical isotope distribution pattern for  $[Yb_2NiC_{46}H_{54}N_4O_{14}]^{2+}$ .

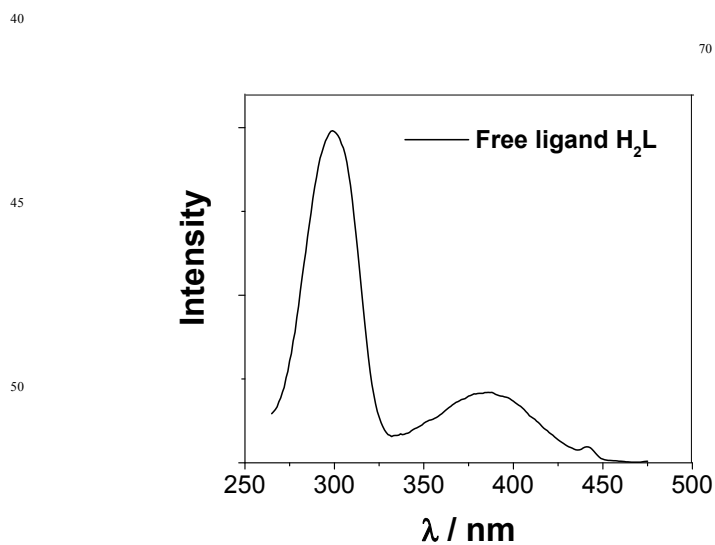

**Figure S14.** Excitation spectrum of the free ligand  $H_2L$  in  $CH_3CN$ .
